# Supplementary material for: Three-Dimensional-Printed Molds from Water-Soluble Sulfate Ceramics for Biocomposite Formation through Low-Pressure Injection Molding
Source: MDPI journal article supplement (doi:10.3390/ma16083077), 2023-04-13
Supplement: s1 [file s1]

# Supplementary materials

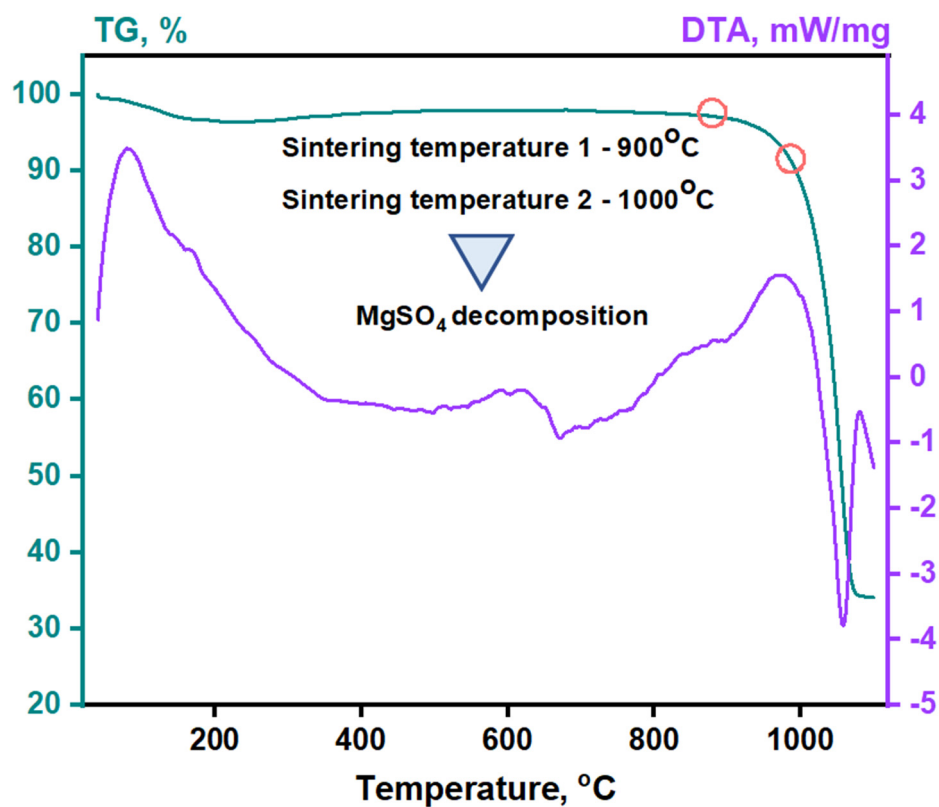

Figure S1. TG/DTA for magnesium sulfate.

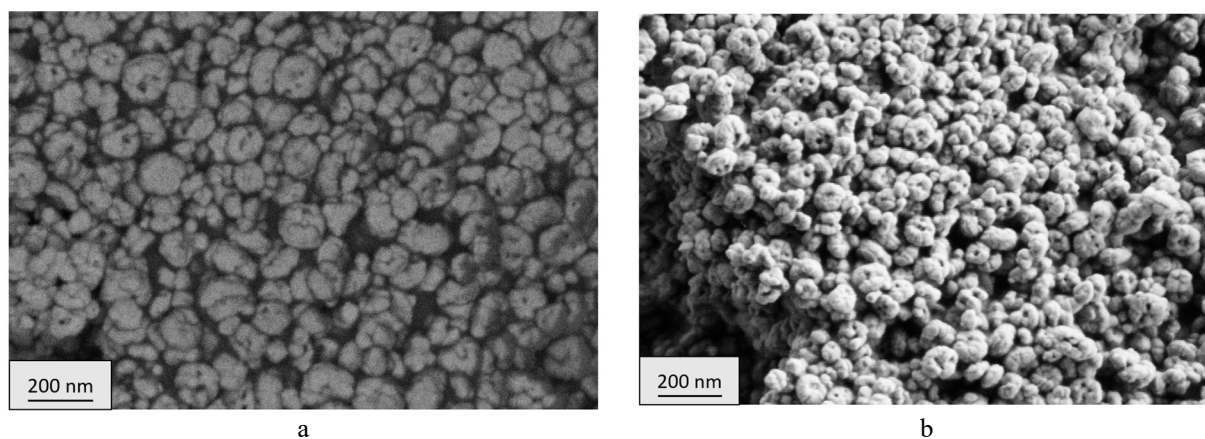

Figure S2. SEM images of the zirconia nanoparticles: (a) BSE detector and (b) SE2 detector.

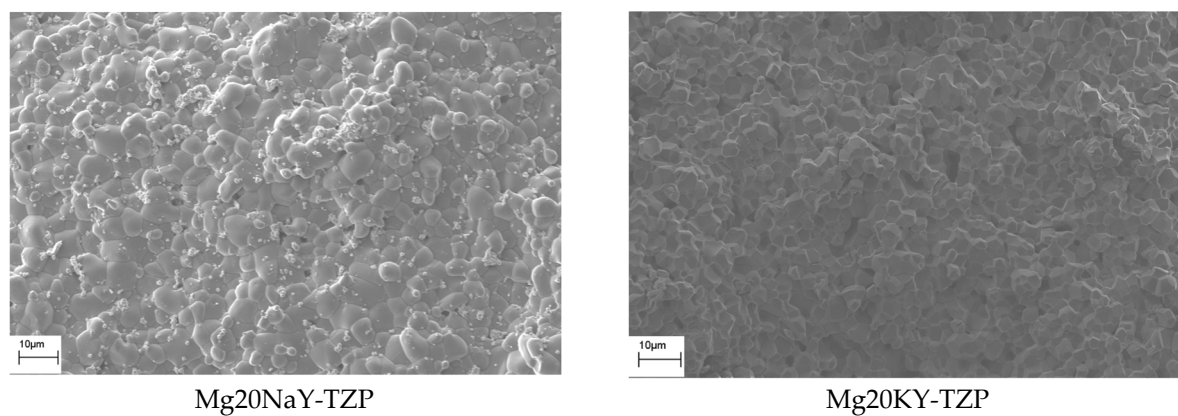

Figure S3. SEM images of the obtained ceramics.

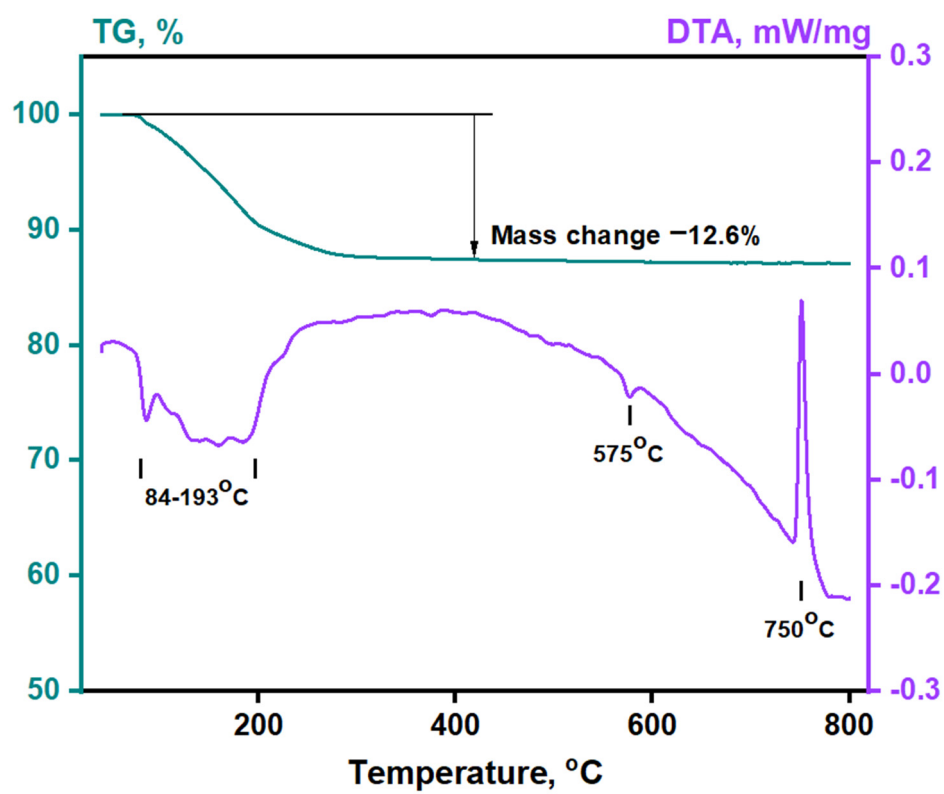

Figure S4. TG/DTA data for Mg<sub>20</sub>KY-TZP.
